# Supplementary material for: Invasive Streptococcus agalactiae infections in infants in Guangzhou, Southern China (2013–2022): molecular epidemiology and clinical management implications
Source: BMC Microbiol. 2026 May 25;26:654. doi: 10.1186/s12866-026-05195-1 (PMC13386615; doi:10.1186/s12866-026-05195-1)
Supplement: Supplementary file 2 — Supplementary material 2. [file 12866_2026_5195_MOESM2_ESM.xlsx]

## Sheet: virulence genes
number	original number	serotype	MLST	CC	cylE	hylB	alphaC	rib	Alp1	Alp2/3	Alp4	PI-1	PI-2a	PI-2b
1	C1	Ⅲ	17	17	+	+		+						+
2	C2	Ⅰb	10	12	+	+		+				+	+
3	C3	V	1	1	+	+	+					+	+
4	C4	Ⅲ	17	17	+	+		+						+
5	C5	Ⅰb	12	12	+	+			+			+	+
6	C6	Ⅰb	12	12	+	+		+					+
7	C6	Ⅲ	17	17	+	+		+						+
8	C8	Ⅲ	17	17	+	+	+					+		+
9	C9	Ⅲ	17	17	+	+		+				+		+
10	C10	Ⅲ	17	17	+	+		+				+		+
11	C11	Ⅰb	12	12	+	+	+					+	+
12	C12	Ⅰa	23	23	+	+			+				+
13	C13	Ⅲ	17	17	+	+		+						+
14	C14	Ⅲ	17	17	+	+		+						+
15	C15	Ⅲ	17	17	+	+		+						+
16	C16	Ⅲ	17	17	+	+		+						+
17	C17	Ⅲ	19	19	+	+		+				+	+
18	C18	Ⅲ	17	17	+	+		+						+
19	C19	Ⅲ	17	17	+	+		+						+
20	C20	V	1	1	+	+		+				+	+
21	C21	Ⅲ	17	空	+	+			+					+
22	C22	Ⅲ	357	17	+	+								+
23	C23	Ⅰb	12	12	+	+		+				+	+
24	C24	Ⅲ	17	17	+	+								+
25	C25	Ⅲ	17	17	+	+		+						+
26	C26	Ⅰb	357	17	+	+	+						+
27	C27	Ⅰb	579	10	+	+	+					+	+
28	C28	Ⅲ	17	17	+	+		+						+
29	C29	Ⅲ	19	19	+	+		+				+	+
30	C30	Ⅲ	17	17	+	+		+						+
31	C31	Ⅲ	17	17	+	+		+						+
32	C56	Ⅲ	17	17	+	+		+						+
33	C57	Ⅲ	17	17	+	+		+						+
34	C58	Ⅲ	17	17	+	+		+						+
35	C59	Ⅲ	27	19	+	+		+				+	+
36	C60	Ⅲ	17	17	+	+		+						+
37	C61	Ⅰa	23	23	+	+			+				+
38	C62	Ⅲ	17	17	+	+		+						+
39	C63	Ⅲ	17	17	+	+		+						+
40	C64	Ⅲ	44	19	+	+		+				+	+
41	C65	Ⅲ	17	17	+	+		+						+
42	C66	Ⅲ	17	17	+	+		+						+
43	C67	Ⅲ	27	19	+	+		+				+	+
44	C69	Ⅲ	17	17	+	+		+						+
45	C70	Ⅲ	17	17	+	+		+						+
46	C71	Ⅲ	17	17	+	+		+						+
47	C72	Ⅲ	17	17	+	+		+						+
48	C73	Ⅰa	399	12	+	+				+			+
49	C74	Ⅲ	861	19	+	+		+				+	+
50	C75	Ⅲ	17	17	+	+		+						+
51	C76	Ⅰa	7	1	+	+	+					+		+
52	C77	Ⅲ	17	17	+	+	+	+				+		+
53	C78	Ⅰa	12	12	+	+	+						+
54	C79	Ⅲ	17	17	+	+		+						+
55	C80	Ⅲ	17	17	+	+		+						+
56	C81	Ⅰa	27	19	+	+		+				+	+
57	C82	Ⅲ	17	17	+	+		+						+
58	C83	Ⅰa	529	327	+	+		+				+	+
59	C84	Ⅰa	485	327	+	+			+					+
60	C85	Ⅲ	17	17	+	+		+				+		+
61	C86	Ⅲ	17	17	+	+		+						+
62	C87	Ⅲ	17	17	+	+								+
63	C88	Ⅲ	19	19	+	+		+				+	+
64	C89	Ⅰa	1964	12	+	+	+					+	+
65	C90	Ⅲ	17	17	+	+		+				+		+
66	C92	Ⅲ	17	17	+	+		+				+		+
67	C93	Ⅲ	17	17	+	+		+						+
68	C94	Ⅲ	17	17	+	+		+						+
69	C95	Ⅰa	12	12	+	+	+					+	+
70	C96	Ⅲ	NT	空	+	+		+					+
71	C97	Ⅲ	17	17	+	+		+						+
72	C98	Ⅲ	17	17	+	+		+				+		+
73	C99	Ⅲ	17	17	+	+		+				+		+
74	C100	Ⅲ	862	空	+	+			+					+
75	C101	Ⅲ	17	17	+	+		+				+		+
76	C102	Ⅰa	890	452	+	+	+						+
77	C103	Ⅲ	17	17	+	+		+				+		+
78	C104	Ⅰa	28	19	+	+		+				+	+
79	C105	Ⅲ	17	17	+	+		+						+
80	C106	Ⅲ	17	17	+	+		+						+
81	C107	Ⅲ	17	17	+	+		+						+
82	C108	Ⅲ	17	17	+	+		+				+		+
83	C109	Ⅰa	NT	空	+	+	+						+
84	C110	Ⅰa	485	327	+	+			+					+
85	C111	Ⅰa	1274	1	+	+	+					+	+
86	C112	Ⅰa	890	452	+	+	+					+	+
87	C113	Ⅰa	24	452	+	+	+						+
88	C114	Ⅲ	17	17	+	+		+						+
89	C115	Ⅰa	529	327	+	+		+				+	+
90	C116	Ⅲ	NT	空	+	+		+						+
91	C117	Ⅰa	23	23	+	+			+			+	+
92	C118	Ⅰa	24	23	+	+	+							+
93	C119	Ⅰb	12	10	+	+	+							+
94	C120	Ⅲ	17	17	+	+		+				+		+
95	C121	Ⅰb	12	10	+	+	+					+		+
96	C122	Ⅲ	17	17	+	+		+				+		+
97	C123	Ⅲ	17	17	+	+		+				+		+
98	C124	Ⅲ	12	12	+	+	+					+	+
99	C125	Ⅲ	17	17	+	+		+				+		+
100	C126	Ⅲ	17	17	+	+		+				+		+
101	C127	Ⅲ	17	17	+	+		+						+
102	C128	Ⅲ	17	17	+	+		+						+
103	C129	Ⅲ	17	17	+	+		+						+
104	C130	Ⅲ	17	17	+	+		+						+
105	C131	Ⅲ	19	19	+	+		+				+		+
106	C132	Ⅰb	12	10	+	+	+						+
107	C133	Ⅲ	19	19	+	+		+				+	+
108	C134	Ⅲ	17	17	+	+		+				+		+
109	C135	Ⅲ	17	17	+	+		+				+		+
110	C136	Ⅲ	17	17	+	+		+				+		+
111	C137	Ⅲ	188	17	+	+		+						+
112	C138	Ⅲ	17	17	+	+		+						+
113	C139	Ⅲ	680		+	+		+				+		+
114	C140	Ⅲ	17	17	+	+		+						+
115	C141	Ⅲ	19	19	+	+		+	+			+		+
116	C142	Ⅰb	12	10	+	+	+					+	+
117	C143	Ⅲ	19	19	+	+		+				+	+
118	C144	Ⅲ	17	17	+	+		+				+		+
119	C145	Ⅲ	17	17	+	+		+				+		+
120	C146	Ⅰb	12	10	+	+	+					+	+
121	C147	Ⅲ	17	17	+	+		+				+		+
122	C148	Ⅰb	10	10	+	+	+					+		+
123	C149	Ⅲ	17	17	+	+		+						+
124	C150	Ⅲ	17	17	+	+		+				+		+
125	C151	Ⅲ	19	19	+	+		+				+	+
126	C152	Ⅲ	19	19	+	+		+				+		+
127	C153	Ⅲ	17	17	+	+		+				+		+
128	C154	Ⅰb	10	10	+	+	+					+	+
129	C155	Ⅲ	17	17	+	+		+				+		+
130	C156	Ⅰb	12	10	+	+	+					+	+
131	C157	Ⅲ	17	17	+	+		+				+		+

## Sheet: total
C	serial number	1-adhP	2-pheS	3-atr	4-glnA	5-sdhA	6-glcK	7-tkt	ST	conal complex
C3	6	1	1	2	1	1	2	2	1	1
C20	25	1	1	2	1	1	2	2	1	1
C76	GZ78	10	1	2	1	3	2	2	7	1
C2	4	9	1	4	1	3	3	2	10	12
C5	8	10	1	4	1	3	3	2	12	12
C6	9	10	1	4	1	3	3	2	12	12
C11	15	10	1	4	1	3	3	2	12	12
C23	29	10	1	4	1	3	3	2	12	12
C78	GZ80	10	1	4	1	3	3	2	12	12
C95	gz49	10	1	4	1	3	3	2	12	12
C124	gz07	10	1	4	1	3	3	2	12	12
C1	2	2	1	1	2	1	1	1	17	17
C4	7	2	1	1	2	1	1	1	17	17
C7	10	2	1	1	2	1	1	1	17	17
C8	11	2	1	1	2	1	1	1	17	17
C9	12	2	1	1	2	1	1	1	17	17
C10	13	2	1	1	2	1	1	1	17	17
C13	18	2	1	1	2	1	1	1	17	17
C14	19	2	1	1	2	1	1	1	17	17
C15	20	2	1	1	2	1	1	1	17	17
C16	21	2	1	1	2	1	1	1	17	17
C18	23	2	1	1	2	1	1	1	17	17
C19	24	2	1	1	2	1	1	1	17	17
C21	27	16	1	4	70	9	3	2	17	空
C24	30	2	1	1	2	1	1	1	17	17
C25	31	2	1	1	2	1	1	1	17	17
C62	GZ64/gz61	2	1	1	2	1	1	1	17	17
C63	GZ65	2	1	1	2	1	1	1	17	17
C65	GZ67	2	1	1	2	1	1	1	17	17
C66	GZ68	2	1	1	2	1	1	1	17	17
C69	GZ71	2	1	1	2	1	1	1	17	17
C70	GZ72/gz74	2	1	1	2	1	1	1	17	17
C71	GZ73	2	1	1	2	1	1	1	17	17
C72	GZ74	2	1	1	2	1	1	1	17	17
C75	GZ77	2	1	1	2	1	1	1	17	17
C77	GZ79	2	1	1	2	1	1	1	17	17
C79	GZ81	2	1	1	2	1	1	1	17	17
C80	GZ82	2	1	1	2	1	1	1	17	17
C82	GZ84	2	1	1	2	1	1	1	17	17
C85	GZ87	2	1	1	2	1	1	1	17	17
C86	GZ88	2	1	1	2	1	1	1	17	17
C87	gz41	2	1	1	2	1	1	1	17	17
C90	gz44	2	1	1	2	1	1	1	17	17
C91	gz45	2	1	1	2	1	1	1	17	17
C92	gz46	2	1	1	2	1	1	1	17	17
C93	gz47	2	1	1	2	1	1	1	17	17
C94	gz48	2	1	1	2	1	1	1	17	17
C97	gz51	2	1	1	2	1	1	1	17	17
C98	gz52	2	1	1	2	1	1	1	17	17
C99	gz53	2	1	1	2	1	1	1	17	17
C101	gz55	2	1	1	2	1	1	1	17	17
C103	gz57	2	1	1	2	1	1	1	17	17
C105	gz60	2	1	1	2	1	1	1	17	17
C106	gz62	2	1	1	2	1	1	1	17	17
C107	gz64	2	1	1	2	1	1	1	17	17
C108	gz65	2	1	1	2	1	1	1	17	17
C114	gz71	2	1	1	2	1	1	1	17	17
C157	gz40	2	1	1	2	1	1	1	17	17
C88	gz42	1	1	3	2	2	2	2	19	19
C12	16	5	4	6	3	2	1	3	23	23
C61	GZ63	5	4	6	3	2	1	3	23	23
C117	gz75	5	4	6	3	2	1	3	23	23
C113	gz70	5	4	4	3	2	3	3	24	452
C67	GZ69	1	1	3	4	2	2	2	27	19
C81	GZ83	1	1	3	4	2	2	2	27	19
C104	gz59	1	1	3	5	2	2	2	28	19
C64	GZ66	1	3	3	2	1	2	2	44	19
C22	28	2	1	1	2	1	3	1	357	17
C73	GZ75	10	1	4	1	3	1	2	399	12
C84	GZ86	16	1	4	2	9	3	2	485	327
C110	gz67	16	1	4	2	9	3	2	485	327
C83	GZ85	1	1	4	4	2	3	2	529	327
C115	gz72	1	1	4	4	2	3	2	529	327
C74	GZ76	1	1	89	2	2	2	2	861	19
C100	gz54	16	1	4	70	9	3	2	862	空
C102	gz56	5	4	4	3	9	3	3	890	452
C112	gz69	5	4	4	3	9	3	3	890	452
C111	gz68	1	1	3	1	1	130	2	1274	1
C89	gz43	404	1	4	1	3	3	2	1964	12
C96	gz50	1	96	3	4	2	85	2	NT
C116	gz73	2	1	1	2	93	1	1	NT
							3	0.0229008

## Sheet: 1-adhP
C	serial number	Locus	Allele	Length	Contig	Start position	End position	Flags
C1	2	adhP	2	498	GZ_2404160801Q_1_1__(Z240416-8125)1F_A133971_G08.ab1	65	562
C2	4	adhP	9	498	GZ_2404160802Q_1_2__(Z240416-8125)1F_A133971_B02.ab1	64	561
C3	6	adhP	1	498	GZ_2404160803Q_1_3__(Z240416-8125)1F_A133971_C02.ab1	64	561
C4	7	adhP	2	498	GZ_2404160804Q_1_4__(Z240416-8125)1F_A133971_D02.ab1	65	562
C5	8	adhP	10	498	GZ_2404160805Q_1_5__(Z240416-8125)1F_A133971_E02.ab1	65	562
C6	9	adhP	10	498	GZ_2310240565G_1_6__(Z231025-8217)adhp-F_A133971_A07.ab1	64	561
C7	10	adhP	2	498	GZ_2310240566G_1_7__(Z231025-8217)adhp-F_A133971_B07.ab1	64	561
C8	11	adhP	2	498	GZ_2310240567G_1_8__(Z231025-8217)adhp-F_A133971_C07.ab1	66	563
C9	12	adhP	2	498	GZ_2310240568G_1_9__(Z231025-8217)adhp-F_A133971_D07.ab1	64		191G → 254A
C10	13	adhP	2	498	GZ_2310240569G_1_10__(Z231025-8217)adhp-F_A133971_E07.ab1	65	562
C11	15	adhP	10	498	GZ_2310240570G_1_11__(Z231025-8217)adhp-F_A133971_F07.ab1	65	562
C12	16	adhP	5	498	GZ_2310240571G_1_12__(Z231025-8217)adhp-F_A133971_G07.ab1	64	561
C13	18	adhP	2	498	GZ_2310240572G_1_13__(Z231025-8217)adhp-F_A133971_H07.ab1	65	562
C14	19	adhP	2	498	GZ_2310240573G_1_14__(Z231025-8217)adhp-F_A133971_A08.ab1	65	562
C15	20	adhP	2	498	GZ_2310240574G_1_15__(Z231025-8217)adhp-F_A133971_B08.ab1	63	560
C16	21	adhP	2	498	GZ_2310240575G_1_16__(Z231025-8217)adhp-F_A133971_C08.ab1	65	562
C18	23	adhP	2	498	GZ_2310240576G_1_18__(Z231025-8217)adhp-F_A133971_D08.ab1	65	562
C19	24	adhP	2	498	GZ_2310240577G_1_19__(Z231025-8217)adhp-F_A133971_E08.ab1	63	560
C20	25	adhP	1	498	GZ_2310240578G_1_20__(Z231025-8217)adhp-F_A133971_F08.ab1	64	561
C21	27	adhP	16	498	GZ_2310240579G_1_21__(Z231025-8217)adhp-F_A133971_G08.ab1	66	563
C22	28	adhP	2	498	GZ_2310240580G_1_22__(Z231025-8217)adhp-F_A133971_H08.ab1	65	562
C23	29	adhP	10	498	GZ_2310240586G_1_23__(Z231025-8217)adhp-F_A133971_F09.ab1	66	563
C24	30	adhP	2	498	GZ_2310240587G_1_24__(Z231025-8217)adhp-F_A133971_G09.ab1	65	562
C25	31	adhP	2	498	GZ_2310240583G_1_25__(Z231025-8217)adhp-F_A133971_C09.ab1	66	563
C61	GZ63	adhP	5	498	GZ_2310240585G_1_61__(Z231025-8217)adhp-F_A133971_E09.ab1	65	562
C62	GZ64/gz61	adhP	2	498	GZ_2310240581G_1_62__(Z231025-8217)adhp-F_A133971_A09.ab1	66	563
C63	GZ65	adhP	2	498	GZ_2310240582G_1_63__(Z231025-8217)adhp-F_A133971_B09.ab1	64	561
C64	GZ66	adhP	1	498	GZ_2310240588G_1_64__(Z231025-8217)adhp-F_A133971_H09.ab1	66	563
C65	GZ67	adhP	2	498	GZ_2310240589G_1_65__(Z231025-8217)adhp-F_A133971_A10.ab1	65	562
C66	GZ68	adhP	2	498	GZ_2310240590G_1_66__(Z231025-8217)adhp-F_A133971_B10.ab1	64	561
C67	GZ69	adhP	1	498	GZ_2310240591G_1_67__(Z231025-8217)adhp-F_A133971_C10.ab1	64	561
C69	GZ71	adhP	2	498	GZ_2310240592G_1_69__(Z231025-8217)adhp-F_A133971_D10.ab1	65	562
C70	GZ72/gz74	adhP	2	498	GZ_2310240593G_1_70__(Z231025-8217)adhp-F_A133971_E10.ab1	64	561
C71	GZ73	adhP	2	498	GZ_2310240594G_1_71__(Z231025-8217)adhp-F_A133971_F10.ab1	64	561
C72	GZ74	adhP	2	498	GZ_2310240595G_1_72__(Z231025-8217)adhp-F_A133971_G10.ab1	64	561
C73	GZ75	adhP	10	498	GZ_2310240596G_1_73__(Z231025-8217)adhp-F_A133971_H10.ab1	69	566
C74	GZ76	adhP	1	498	GZ_2310240601Q_1_74__(Z231025-8217)adhp-F_A133971_A02-0.ab1	64	561
C75	GZ77	adhP	2	498	GZ_2310240602Q_1_75__(Z231025-8217)adhp-F_A133971_B02-0.ab1	63	560
C76	GZ78	adhP	10	498	GZ_2310240603Q_1_76__(Z231025-8217)adhp-F_A133971_C02-0.ab1	64	561
C77	GZ79	adhP	2	498	GZ_2310240604Q_1_77__(Z231025-8217)adhp-F_A133971_D02-0.ab1	64	561
C78	GZ80	adhP	10	498	GZ_2310240605Q_1_78__(Z231025-8217)adhp-F_A133971_E02-0.ab1	64	561
C79	GZ81	adhP	2	498	GZ_2310240606Q_1_79__(Z231025-8217)adhp-F_A133971_F02-0.ab1	65	562
C80	GZ82	adhP	2	498	GZ_2310240607Q_1_80__(Z231025-8217)adhp-F_A133971_G02-0.ab1	63	560
C81	GZ83	adhP	1	498	GZ_2310240608Q_1_81__(Z231025-8217)adhp-F_A133971_H02-0.ab1	63	560
C82	GZ84	adhP	2	498	2d1a3bf89fe04f8eab12d459b374698b	65	562
C83	GZ85	adhP	1	498	GZ_2310240610Q_1_83__(Z231025-8217)adhp-F_A133971_B03-0.ab1	64	561
C84	GZ86	adhP	16	498	GZ_2310240611Q_1_84__(Z231025-8217)adhp-F_A133971_A08.ab1	65	562
C85	GZ87	adhP	2	498	GZ_2310240612Q_1_85__(Z231025-8217)adhp-F_A133971_D03-0.ab1	64	561
C86	GZ88	adhP	2	498	591708af975a4d54b1e41b4e1073bab9	63	560
C87	gz41	adhP	2	498	GZ_2310240614Q_1_87__(Z231025-8217)adhp-F_A133971_B08.ab1	66	563
C88	gz42	adhP	1	498	GZ_2310240615Q_1_88__(Z231025-8217)adhp-F_A133971_G03-0.ab1	63	560
C89	gz43	adhP	404	498	GZ_2310240616Q_1_89__(Z231025-8217)adhp-F_A133971_H03.ab1	65	562
C90	gz44	adhP	2	498	GZ_2310240617Q_1_90__(Z231025-8217)adhp-F_A133971_C08.ab1	65	562
C91	gz45	adhP	2	498	GZ_2310240618Q_1_91__(Z231025-8217)adhp-F_A133971_B04-0.ab1	63	560
C92	gz46	adhP	2	498	0569362e505e4269a0a26eed484ab022	64	561
C93	gz47	adhP	2	498	GZ_2404160808Q_1_93__(Z240416-8125)1F_A133971_H02.ab1	65	562
C94	gz48	adhP	2	498	01b99758e39143ad998ecb378aaf338d	62	559
C95	gz49	adhP	10	498	690da46dc05c4dcb970e567f4c53273d	63	560
C96	gz50	adhP	1	498	GZ_2310240623Q_1_96__(Z231025-8217)adhp-F_A133971_G04-0.ab1	65	562
C97	gz51	adhP	2	498	GZ_2310240624Q_1_97__(Z231025-8217)adhp-F_A133971_H04-0.ab1	65	562
C98	gz52	adhP	2	498	GZ_2401290701Q_1_98__(Z240129-7767)adhP-F_A133971_A09.ab1	65	562
C99	gz53	adhP	2	498	GZ_2401160414Q_1_99__(Z240115-6348)adhP-F_A133971_H02.ab1	65	562
C100	gz54	adhP	16	498	GZ_2401160415Q_1_100__(Z240115-6348)adhP-F_A133971_D05.ab1	64	561
C101	gz55	adhP	2	498	GZ_2401160416Q_1_101__(Z240115-6348)adhP-F_A133971_B03.ab1	65	562
C102	gz56	adhP	5	498	GZ_2401160417Q_1_102__(Z240115-6348)adhP-F_A133971_C03.ab1	65	562
C103	gz57	adhP	2	498	GZ_2401160418Q_1_103__(Z240115-6348)adhP-F_A133971_D03.ab1	66	563
C104	gz59	adhP	1	498	GZ_2401160419Q_1_104__(Z240115-6348)adhP-F_A133971_E03.ab1	68	565
C105	gz60	adhP	2	498	GZ_2401160420Q_1_105__(Z240115-6348)adhP-F_A133971_F03.ab1	67	564
C106	gz62	adhP	2	498	GZ_2401160421Q_1_106__(Z240115-6348)adhP-F_A133971_G03.ab1	65	562
C107	gz64	adhP	2	498	GZ_2401160422Q_1_107__(Z240115-6348)adhP-F_A133971_D06.ab1	68	565
C108	gz65	adhP	2	498	GZ_2310240401Q_65-1__(Z231025-8217)adhp-F_A133971_B01.ab1	66	563
C109	gz66	adhP	10	498	GZ_2310240409Q_66-1__(Z231025-8217)adhp-F_A133971_A11.ab1	78	575
C110	gz67	adhP	16	498	GZ_2310240417Q_67-1__(Z231025-8217)adhp-F_A133971_B11.ab1	77	574
C111	gz68	adhP	1	498	GZ_2401160423Q_1_111__(Z240115-6348)adhP-F_A133971_E06.ab1	66	563
C112	gz69	adhP	5	498	GZ_2310240433Q_69-1__(Z231025-8217)adhp-F_A133971_C11.ab1	64	561
C113	gz70	adhP	5	498	GZ_2310240441Q_70-1__(Z231025-8217)adhp-F_A133971_D11.ab1	65	562
C114	gz71	adhP	2	498	GZ_2310240449Q_71-1__(Z231025-8217)adhp-F_A133971_E11.ab1	65	562
C115	gz72	adhP	1	498	GZ_2310240457Q_72-1__(Z231025-8217)adhp-F_A133971_F11.ab1	64	561
C116	gz73	adhP	2	498	GZ_2310240465Q_73-1__(Z231025-8217)adhp-F_A133971_G11.ab1	69	566
C117	gz75	adhP	5	498	GZ_2310240473Q_75-1__(Z231025-8217)adhp-F_A133971_H11.ab1	77	574
C124	gz07	adhP	10	498	GZ_2404160806Q_1_7__(Z240416-8125)1F_A133971_F02.ab1	62	559
C157	gz40	adhP	2	498	GZ_2404160807Q_1_40__(Z240416-8125)1F_A133971_G02.ab1	64	561

## Sheet: 2-pheS
C	serial number	Locus	Allele	Length	Contig	Start position	End position	Flags
C1	2	pheS	1	501	GZ_2404160809Q_2_1__(Z240416-8127)2F_A133971_A03.ab1	98	598
C2	4	pheS	1	501	GZ_2404160810Q_2_2__(Z240416-8127)2F_A133971_B03.ab1	100	600
C3	6	pheS	1	501	GZ_2404160811Q_2_3__(Z240416-8127)2F_A133971_C03.ab1	99	599
C4	7	pheS	1	501	GZ_2404160812Q_2_4__(Z240416-8127)2F_A133971_D03.ab1	99	599
C5	8	pheS	1	501	GZ_2404160813Q_2_5__(Z240416-8127)2F_A133971_E03.ab1	100	600
C6	9	pheS	1	501	GZ_2310240625Q_2_6__(Z231025-8215)phes-F_A133971_D02.ab1	102	602
C7	10	pheS	1	501	GZ_2310240626Q_2_7__(Z231025-8215)phes-F_A133971_E02.ab1	103	603
C8	11	pheS	1	501	GZ_2404160816Q_2_8__(Z240416-8127)2F_A133971_H03.ab1	99	599
C9	12	pheS	1	501	GZ_2310240628Q_2_9__(Z231025-8215)phes-F_A133971_G02.ab1	103	603
C10	13	pheS	1	501	GZ_2310240629Q_2_10__(Z231025-8215)phes-F_A133971_D08.ab1	99	599
C11	15	pheS	1	501	GZ_2310240630Q_2_11__(Z231025-8215)phes-F_A133971_A11.ab1	100	600
C12	16	pheS	4	501	GZ_2310240631Q_2_12__(Z231025-8215)phes-F_A133971_B11.ab1	106	606
C13	18	pheS	1	501	GZ_2310240632Q_2_13__(Z231025-8215)phes-F_A133971_C11.ab1	99	599
C14	19	pheS	1	501	GZ_2401160426Q_2_14__(Z240115-6350)pheS-F_A133971_C04.ab1	99	599
C15	20	pheS	1	501	GZ_2401160427Q_2_15__(Z240115-6350)pheS-F_A133971_D04.ab1	99	599
C16	21	pheS	1	501	GZ_2401160428Q_2_16__(Z240115-6350)pheS-F_A133971_E04.ab1	97	597
C18	23	pheS	1	501	GZ_2401160429Q_2_18__(Z240115-6350)pheS-F_A133971_F04.ab1	97	597
C19	24	pheS	1	501	GZ_2401160430Q_2_19__(Z240115-6350)pheS-F_A133971_G04.ab1	96	596
C20	25	pheS	1	501	GZ_2310240638Q_2_20__(Z231025-8215)phes-F_A133971_H02.ab1	108	608
C21	27	pheS	1	501	GZ_2310240639Q_2_21__(Z231025-8215)phes-F_A133971_A03.ab1	99	599
C22	28	pheS	1	501	GZ_2401290703Q_2_22__(Z240129-7769)pheS-F_A133971_C09.ab1	98	598
C23	29	pheS	1	501	GZ_2310240641Q_2_23__(Z231025-8215)phes-F_A133971_B03.ab1	103	603
C24	30	pheS	1	501	GZ_2401160432Q_2_24__(Z240115-6350)pheS-F_A133971_H04.ab1	97	597
C25	31	pheS	1	501	GZ_2401160433Q_2_25__(Z240115-6350)pheS-F_A133971_A05.ab1	100	600
C61	GZ63	pheS	4	501	GZ_2310240644Q_2_61__(Z231025-8215)phes-F_A133971_C03.ab1	101	601
C62	GZ64/gz61	pheS	1	501	GZ_2401160434Q_2_62__(Z240115-6350)pheS-F_A133971_B05.ab1	98	598
C63	GZ65	pheS	1	501	GZ_2401160435Q_2_63__(Z240115-6350)pheS-F_A133971_C05.ab1	96	596
C64	GZ66	pheS	1	501	GZ_2310240647Q_2_64__(Z231025-8215)phes-F_A133971_D03.ab1	103	603
C65	GZ67	pheS	1	501	GZ_2310240648Q_2_65__(Z231025-8215)phes-F_A133971_E03.ab1	101	601
C66	GZ68	pheS	1	501	GZ_2401160436Q_2_66__(Z240115-6350)pheS-F_A133971_D05.ab1	98	598
C67	GZ69	pheS	1	501	GZ_2310240650Q_2_67__(Z231025-8215)phes-F_A133971_F03.ab1	102	602
C69	GZ71	pheS	1	501	GZ_2401160437Q_2_69__(Z240115-6350)pheS-F_A133971_E05.ab1	99	599
C70	GZ72/gz74	pheS	1	501	GZ_2401160438Q_2_70__(Z240115-6350)pheS-F_A133971_F05.ab1	96	596
C71	GZ73	pheS	1	501	GZ_2401160439Q_2_71__(Z240115-6350)pheS-F_A133971_G05.ab1	96	596
C72	GZ74	pheS	1	501	GZ_2401160440Q_2_72__(Z240115-6350)pheS-F_A133971_H05.ab1	100	600
C73	GZ75	pheS	1	501	GZ_2310240655Q_2_73__(Z231025-8215)phes-F_A133971_G03.ab1	104	604
C74	GZ76	pheS	1	501	GZ_2310240656Q_2_74__(Z231025-8215)phes-F_A133971_H03.ab1	103	603
C75	GZ77	pheS	1	501	GZ_2401160442Q_2_75__(Z240115-6350)pheS-F_A133971_B06.ab1	96	596
C76	GZ78	pheS	1	501	GZ_2310240658Q_2_76__(Z231025-8215)phes-F_A133971_E08.ab1	101	601
C77	GZ79	pheS	1	501	GZ_2310240659Q_2_77__(Z231025-8215)phes-F_A133971_A04.ab1	99	599
C78	GZ80	pheS	1	501	GZ_2310240660Q_2_78__(Z231025-8215)phes-F_A133971_B04.ab1	104	604
C79	GZ81	pheS	1	501	GZ_2401160443Q_2_79__(Z240115-6350)pheS-F_A133971_C06.ab1	97	597
C80	GZ82	pheS	1	501	GZ_2401160444Q_2_80__(Z240115-6350)pheS-F_A133971_D06.ab1	96	596
C81	GZ83	pheS	1	501	GZ_2310240663Q_2_81__(Z231025-8215)phes-F_A133971_C04.ab1	102	602
C82	GZ84	pheS	1	501	GZ_2310240664Q_2_82__(Z231025-8215)phes-F_A133971_D04.ab1	100	600
C83	GZ85	pheS	1	501	GZ_2310240665Q_2_83__(Z231025-8215)phes-F_A133971_E04.ab1	103	603
C84	GZ86	pheS	1	501	GZ_2310240666Q_2_84__(Z231025-8215)phes-F_A133971_F04.ab1	100	600
C85	GZ87	pheS	1	501	GZ_2401160445Q_2_85__(Z240115-6350)pheS-F_A133971_E06.ab1	97	597
C86	GZ88	pheS	1	501	GZ_2401160446Q_2_86__(Z240115-6350)pheS-F_A133971_F06.ab1	96	596
C87	gz41	pheS	1	501	GZ_2401160447Q_2_87__(Z240115-6350)pheS-F_A133971_G06.ab1	98	598
C88	gz42	pheS	1	501	GZ_2310240670Q_2_88__(Z231025-8215)phes-F_A133971_G04.ab1	100	600
C89	gz43	pheS	1	501	GZ_2310240671Q_2_89__(Z231025-8215)phes-F_A133971_H04.ab1	99	599
C90	gz44	pheS	1	501	GZ_2310240672Q_2_90__(Z231025-8215)phes-F_A133971_A05.ab1	100	600
C91	gz45	pheS	1	501	GZ_2401160448Q_2_91__(Z240115-6350)pheS-F_A133971_H06.ab1	97	597
C92	gz46	pheS	1	501	GZ_2401160449Q_2_92__(Z240115-6350)pheS-F_A133971_A07.ab1	98	598
C93	gz47	pheS	1	501	GZ_2401160450Q_2_93__(Z240115-6350)pheS-F_A133971_B07.ab1	96	596
C94	gz48	pheS	1	501	GZ_2401160451Q_2_94__(Z240115-6350)pheS-F_A133971_C07.ab1	96	596
C95	gz49	pheS	1	501	GZ_2310240677Q_2_95__(Z231025-8215)phes-F_A133971_B05.ab1	102	602
C96	gz50	pheS	96	45				SAG0869 (pheS): 96
C97	gz51	pheS	1	501	GZ_2401160452Q_2_97__(Z240115-6350)pheS-F_A133971_D07.ab1	99	599
C98	gz52	pheS	1	501	GZ_2401160453Q_2_98__(Z240115-6350)pheS-F_A133971_E07.ab1	102	602
C99	gz53	pheS	1	501	GZ_2401160454Q_2_99__(Z240115-6350)pheS-F_A133971_F07.ab1	97	597
C100	gz54	pheS	1	501	GZ_2401160455Q_2_100__(Z240115-6350)pheS-F_A133971_G07.ab1	98	598
C101	gz55	pheS	1	501	GZ_2401160456Q_2_101__(Z240115-6350)pheS-F_A133971_H07.ab1	98	598
C102	gz56	pheS	4	501	GZ_2401160457Q_2_102__(Z240115-6350)pheS-F_A133971_A08.ab1	98	598
C103	gz57	pheS	1	501	GZ_2401160458Q_2_103__(Z240115-6350)pheS-F_A133971_B08.ab1	95	595
C104	gz59	pheS	1	501	GZ_2401160459Q_2_104__(Z240115-6350)pheS-F_A133971_C08.ab1	99	599
C105	gz60	pheS	1	501	GZ_2401160460Q_2_105__(Z240115-6350)pheS-F_A133971_D08.ab1	98	598
C106	gz62	pheS	1	501	GZ_2401160461Q_2_106__(Z240115-6350)pheS-F_A133971_E08.ab1	97	597
C107	gz64	pheS	1	501	GZ_2401160462Q_2_107__(Z240115-6350)pheS-F_A133971_F08.ab1	96	596
C108	gz65	pheS	1	501	GZ_2401160463Q_2_108__(Z240115-6350)pheS-F_A133971_G08.ab1	99	599
C109	gz66	pheS	1	501	GZ_2401160464Q_2_109__(Z240115-6350)pheS-F_A133971_H08.ab1	98	598
C110	gz67	pheS	1	501	GZ_2310240418Q_67-2__(Z231025-8215)phes-F_A133971_D10.ab1	99	599
C111	gz68	pheS	1	501	GZ_2401160465Q_2_111__(Z240115-6350)pheS-F_A133971_A09.ab1	97	597
C112	gz69	pheS	4	501	GZ_2310240434Q_69-2__(Z231025-8215)phes-F_A133971_E10.ab1	96	596
C113	gz70	pheS	4	501	GZ_2310240442Q_70-2__(Z231025-8215)phes-F_A133971_F10.ab1	100	600
C114	gz71	pheS	1	501	GZ_2401160466Q_2_114__(Z240115-6350)pheS-F_A133971_B09.ab1	95	595
C115	gz72	pheS	1	501	GZ_2310240458Q_72-2__(Z231025-8215)phes-F_A133971_G10.ab1	98	598
C116	gz73	pheS	1	501	GZ_2401160467Q_2_116__(Z240115-6350)pheS-F_A133971_C09.ab1	97	597
C117	gz75	pheS	4	501	GZ_2310240474Q_75-2__(Z231025-8215)phes-F_A133971_H10.ab1	99	599
C124	gz07	pheS	1	501	GZ_2404160814Q_2_7__(Z240416-8127)2F_A133971_F03.ab1	98	598
C157	gz40	pheS	1	501	GZ_2404160815Q_2_40__(Z240416-8127)2F_A133971_G03.ab1	99	599

## Sheet: 3-atr
C自编	流水编号	Locus	Allele	Length	Contig	Start position	End position	Flags
C1	2	atr	1	501	GZ_2404160817Q_3_1__(Z240416-8129)3R_A133971_E07.ab1	127	627
C2	4	atr	4	501	GZ_2404160818Q_3_2__(Z240416-8129)3R_A133971_F07.ab1	127	627
C3	6	atr	2	501	GZ_2404160819Q_3_3__(Z240416-8129)3R_A133971_G07.ab1	126	626
C4	7	atr	1	501	GZ_2404160820Q_3_4__(Z240416-8129)3R_A133971_H07.ab1	128	628
C5	8	atr	4	501	GZ_2404160821Q_3_5__(Z240416-8129)3R_A133971_A08.ab1	127	627
C6	9	atr	4	501	GZ_2401160101Q_3_6__(Z240115-6338)atr-F_A133971_A04.ab1	99	599
C7	10	atr	1	501	GZ_2401160102Q_3_7__(Z240115-6338)atr-F_A133971_B04.ab1	99	599
C8	11	atr	1	501	GZ_2401160103Q_3_8__(Z240115-6338)atr-F_A133971_C04.ab1	98	598
C9	12	atr	1	501	GZ_2401160104Q_3_9__(Z240115-6338)atr-F_A133971_D04.ab1	99	599
C10	13	atr	1	501	GZ_2401160105Q_3_10__(Z240115-6338)atr-F_A133971_E04.ab1	98	598
C11	15	atr	4	501	GZ_2401160106Q_3_11__(Z240115-6338)atr-F_A133971_F04.ab1	97	597
C12	16	atr	6	501	GZ_2401160107Q_3_12__(Z240115-6338)atr-F_A133971_G04.ab1	99	599
C13	18	atr	1	501	GZ_2401160108Q_3_13__(Z240115-6338)atr-F_A133971_H04.ab1	101	601
C14	19	atr	1	501	GZ_2401160109Q_3_14__(Z240115-6338)atr-F_A133971_A05.ab1	100	600
C15	20	atr	1	501	GZ_2401160110Q_3_15__(Z240115-6338)atr-F_A133971_B05.ab1	98	598
C16	21	atr	1	501	GZ_2401160111Q_3_16__(Z240115-6338)atr-F_A133971_C05.ab1	98	598
C18	23	atr	1	501	GZ_2401160112Q_3_18__(Z240115-6338)atr-F_A133971_D05.ab1	100	600
C19	24	atr	1	501	GZ_2401160113Q_3_19__(Z240115-6338)atr-F_A133971_E05.ab1	100	600
C20	25	atr	2	501	GZ_2401160114Q_3_20__(Z240115-6338)atr-F_A133971_F05.ab1	98	598
C21	27	atr	4	501	GZ_2401160115Q_3_21__(Z240115-6338)atr-F_A133971_G05.ab1	99	599
C22	28	atr	1	501	GZ_2401160116Q_3_22__(Z240115-6338)atr-F_A133971_H05.ab1	102	602
C23	29	atr	4	501	GZ_2401160117Q_3_23__(Z240115-6338)atr-F_A133971_A06.ab1	97	597
C24	30	atr	1	501	GZ_2401160118Q_3_24__(Z240115-6338)atr-F_A133971_B06.ab1	103	603
C25	31	atr	1	501	GZ_2401160119Q_3_25__(Z240115-6338)atr-F_A133971_C06.ab1	99	599
C61	GZ63	atr	6	501	GZ_2401160120Q_3_61__(Z240115-6338)atr-F_A133971_D06.ab1	98	598
C62	GZ64/gz61	atr	1	501	GZ_2401160121Q_3_62__(Z240115-6338)atr-F_A133971_E06.ab1	99	599
C63	GZ65	atr	1	501	GZ_2401160122Q_3_63__(Z240115-6338)atr-F_A133971_F06.ab1	98	598
C64	GZ66	atr	3	501	GZ_2401160123Q_3_64__(Z240115-6338)atr-F_A133971_G06.ab1	98	598
C65	GZ67	atr	1	501	GZ_2401160125Q_3_65__(Z240115-6338)atr-F_A133971_A07.ab1	100	600
C66	GZ68	atr	1	501	GZ_2401160126Q_3_66__(Z240115-6338)atr-F_A133971_B07.ab1	98	598
C67	GZ69	atr	3	501	GZ_2401160127Q_3_67__(Z240115-6338)atr-F_A133971_C07.ab1	98	598
C69	GZ71	atr	1	501	GZ_2401160128Q_3_69__(Z240115-6338)atr-F_A133971_D07.ab1	98	598
C70	GZ72/gz74	atr	1	501	GZ_2401160129Q_3_70__(Z240115-6338)atr-F_A133971_E07.ab1	100	600
C71	GZ73	atr	1	501	GZ_2401160130Q_3_71__(Z240115-6338)atr-F_A133971_F07.ab1	99	599
C72	GZ74	atr	1	501	GZ_2401160131Q_3_72__(Z240115-6338)atr-F_A133971_G07.ab1	98	598
C73	GZ75	atr	4	501	GZ_2401160132Q_3_73__(Z240115-6338)atr-F_A133971_H07.ab1	98	598
C74	GZ76	atr	89	501	GZ_2401160133Q_3_74__(Z240115-6338)atr-F_A133971_A08.ab1	98	598
C75	GZ77	atr	1	501	GZ_2401160134Q_3_75__(Z240115-6338)atr-F_A133971_B08.ab1	99	599
C76	GZ78	atr	2	501	GZ_2401160135Q_3_76__(Z240115-6338)atr-F_A133971_C08.ab1	97	597
C77	GZ79	atr	1	501	GZ_2401160136Q_3_77__(Z240115-6338)atr-F_A133971_D08.ab1	99	599
C78	GZ80	atr	4	501	GZ_2401160137Q_3_78__(Z240115-6338)atr-F_A133971_E08.ab1	98	598
C79	GZ81	atr	1	501	GZ_2401160138Q_3_79__(Z240115-6338)atr-F_A133971_F08.ab1	100	600
C80	GZ82	atr	1	501	GZ_2401160139Q_3_80__(Z240115-6338)atr-F_A133971_G08.ab1	100	600
C81	GZ83	atr	3	501	GZ_2401160140Q_3_81__(Z240115-6338)atr-F_A133971_H08.ab1	99	599
C82	GZ84	atr	1	501	GZ_2401160141Q_3_82__(Z240115-6338)atr-F_A133971_A09.ab1	100	600
C83	GZ85	atr	4	501	GZ_2401160142Q_3_83__(Z240115-6338)atr-F_A133971_B09.ab1	99	599
C84	GZ86	atr	4	501	GZ_2401160143Q_3_84__(Z240115-6338)atr-F_A133971_C09.ab1	99	599
C85	GZ87	atr	1	501	GZ_2401160144Q_3_85__(Z240115-6338)atr-F_A133971_D09.ab1	98	598
C86	GZ88	atr	1	501	GZ_2401160145Q_3_86__(Z240115-6338)atr-F_A133971_E09.ab1	98	598
C87	gz41	atr	1	501	GZ_2401160146Q_3_87__(Z240115-6338)atr-F_A133971_F09.ab1	99	599
C88	gz42	atr	3	501	GZ_2401160147Q_3_88__(Z240115-6338)atr-F_A133971_G09.ab1	98	598
C89	gz43	atr	4	501	GZ_2401160148Q_3_89__(Z240115-6338)atr-F_A133971_H09.ab1	101	601
C90	gz44	atr	1	501	GZ_2401160149Q_3_90__(Z240115-6338)atr-F_A133971_A10.ab1	100	600
C91	gz45	atr	1	501	GZ_2401160150Q_3_91__(Z240115-6338)atr-F_A133971_B10.ab1	99	599
C92	gz46	atr	1	501	GZ_2401160151Q_3_92__(Z240115-6338)atr-F_A133971_C10.ab1	100	600
C93	gz47	atr	1	501	GZ_2401160152Q_3_93__(Z240115-6338)atr-F_A133971_D10.ab1	99	599
C94	gz48	atr	1	501	GZ_2401160153Q_3_94__(Z240115-6338)atr-F_A133971_E10.ab1	99	599
C95	gz49	atr	4	501	GZ_2401160154Q_3_95__(Z240115-6338)atr-F_A133971_F10.ab1	99	599
C96	gz50	atr	3	501	GZ_2401160155Q_3_96__(Z240115-6338)atr-F_A133971_G10.ab1	99	599
C97	gz51	atr	1	501	GZ_2401160156Q_3_97__(Z240115-6338)atr-F_A133971_H10.ab1	102	602
C98	gz52	atr	1	501	GZ_2401160157Q_3_98__(Z240115-6338)atr-F_A133971_A11.ab1	100	600
C99	gz53	atr	1	501	GZ_2401160158Q_3_99__(Z240115-6338)atr-F_A133971_B11.ab1	100	600
C100	gz54	atr	4	501	GZ_2401160159Q_3_100__(Z240115-6338)atr-F_A133971_C11.ab1	99	599
C101	gz55	atr	1	501	GZ_2401160160Q_3_101__(Z240115-6338)atr-F_A133971_D11.ab1	98	598
C102	gz56	atr	4	501	GZ_2401160161Q_3_102__(Z240115-6338)atr-F_A133971_E11.ab1	99	599
C103	gz57	atr	1	501	GZ_2401160162Q_3_103__(Z240115-6338)atr-F_A133971_F11.ab1	98	598
C104	gz59	atr	3	501	GZ_2401160163Q_3_104__(Z240115-6338)atr-F_A133971_G11.ab1	98	598
C105	gz60	atr	1	501	GZ_2401160164Q_3_105__(Z240115-6338)atr-F_A133971_H11.ab1	99	599
C106	gz62	atr	1	501	GZ_2401160165Q_3_106__(Z240115-6338)atr-F_A133971_B12.ab1	112	612
C107	gz64	atr	1	501	GZ_2401160166Q_3_107__(Z240115-6338)atr-F_A133971_C12.ab1	115	615
C108	gz65	atr	1	501	GZ_2401160167Q_3_108__(Z240115-6338)atr-F_A133971_D12.ab1	99	599
C109	gz66	atr	4	501	GZ_2401160168Q_3_109__(Z240115-6338)atr-F_A133971_E12.ab1	114	614
C110	gz67	atr	4	501	GZ_2401160169Q_3_110__(Z240115-6338)atr-F_A133971_B01.ab1	100	600
C111	gz68	atr	3	501	GZ_2401160170Q_3_111__(Z240115-6338)atr-F_A133971_C01.ab1	100	600
C112	gz69	atr	4	501	GZ_2401160171Q_3_112__(Z240115-6338)atr-F_A133971_D01.ab1	100	600
C113	gz70	atr	4	501	GZ_2401160172Q_3_113__(Z240115-6338)atr-F_A133971_E01.ab1	101	601
C114	gz71	atr	1	501	GZ_2401160173Q_3_114__(Z240115-6338)atr-F_A133971_A02.ab1	102	602
C115	gz72	atr	4	501	GZ_2401160174Q_3_115__(Z240115-6338)atr-F_A133971_B02.ab1	100	600
C116	gz73	atr	1	501	GZ_2401160175Q_3_116__(Z240115-6338)atr-F_A133971_C02.ab1	100	600
C117	gz75	atr	6	501	GZ_2401160176Q_3_117__(Z240115-6338)atr-F_A133971_D02.ab1	98	598
C124	gz07	atr	4	501	GZ_2404160822Q_3_7__(Z240416-8129)3R_A133971_B08.ab1	128	628
C157	gz40	atr	1	501	GZ_2404160823Q_3_40__(Z240416-8129)3R_A133971_C08.ab1	128	628

## Sheet: 4-glnA
C自编	serial number	Locus	Allele	Length	Contig	Start position	End position	Flags
C1	2	glnA	2	498	GZ_2404160825Q_4_1__(Z240416-8130)4F_A133971_A04.ab1	69	566
C2	4	glnA	1	498	GZ_2404160826Q_4_2__(Z240416-8130)4F_A133971_B04.ab1	69	566
C3	6	glnA	1	498	GZ_2404160827Q_4_3__(Z240416-8130)4F_A133971_C04.ab1	67	564
C4	7	glnA	2	498	GZ_2404160828Q_4_4__(Z240416-8130)4F_A133971_D04.ab1	69	566
C5	8	glnA	1	498	GZ_2404160829Q_4_5__(Z240416-8130)4F_A133971_E04.ab1	70	567
C6	9	glnA	1	498	GZ_2310300901Q_4_6__(Z231030-8253)GLNA-F_A133971_A03.ab1	69	566
C7	10	glnA	2	498	GZ_2310300902Q_4_7__(Z231030-8253)GLNA-F_A133971_B03.ab1	68	565
C8	11	glnA	2	498	GZ_2310300903Q_4_8__(Z231030-8253)GLNA-F_A133971_C03.ab1	70	567
C9	12	glnA	2	498	GZ_2310300903Q_4_8__(Z231030-8253)GLNA-F_A133971_C03.ab1	70	567
C10	13	glnA	2	498	GZ_2310300905Q_4_10__(Z231030-8253)GLNA-F_A133971_E03.ab1	70	567
C11	15	glnA	1	498	GZ_2310300906Q_4_11__(Z231030-8253)GLNA-F_A133971_F03.ab1	70	567
C12	16	glnA	3	498	GZ_2310300907Q_4_12__(Z231030-8253)GLNA-F_A133971_G03.ab1	67	564
C13	18	glnA	2	498	GZ_2310300908Q_4_13__(Z231030-8253)GLNA-F_A133971_A07.ab1	81	578
C14	19	glnA	2	498	GZ_2310300909Q_4_14__(Z231030-8253)GLNA-F_A133971_A04.ab1	70	567
C15	20	glnA	2	498	GZ_2310300910Q_4_15__(Z231030-8253)GLNA-F_A133971_B04.ab1	68	565
C16	21	glnA	2	498	GZ_2310300911Q_4_16__(Z231030-8253)GLNA-F_A133971_C04.ab1	68	565
C18	23	glnA	2	498	GZ_2310300912Q_4_18__(Z231030-8253)GLNA-F_A133971_D04.ab1	69	566
C19	24	glnA	2	498	GZ_2310300913Q_4_19__(Z231030-8253)GLNA-F_A133971_E04.ab1	69	566
C20	25	glnA	1	498	GZ_2310300914Q_4_20__(Z231030-8253)GLNA-F_A133971_F04.ab1	69	566
C21	27	glnA	70	498	GZ_2310300915Q_4_21__(Z231030-8253)GLNA-F_A133971_G04.ab1	72	569
C22	28	glnA	2	498	GZ_2310300916Q_4_22__(Z231030-8253)GLNA-F_A133971_H04.ab1	68	565
C23	29	glnA	1	498	GZ_2310300917Q_4_23__(Z231030-8253)GLNA-F_A133971_A05.ab1	68	565
C24	30	glnA	2	498	GZ_2310300918Q_4_24__(Z231030-8253)GLNA-F_A133971_B05.ab1	70	567
C25	31	glnA	2	498	GZ_2310300919Q_4_25__(Z231030-8253)GLNA-F_A133971_C05.ab1	69	566
C61	GZ63	glnA	3	498	GZ_2310300920Q_4_61__(Z231030-8253)GLNA-F_A133971_D05.ab1	68	565
C62	GZ64/gz61	glnA	2	498	GZ_2310300921Q_4_62__(Z231030-8253)GLNA-F_A133971_E05.ab1	68	565
C63	GZ65	glnA	2	498	GZ_2310300922Q_4_63__(Z231030-8253)GLNA-F_A133971_F05.ab1	69	566
C64	GZ66	glnA	2	498	GZ_2310300923Q_4_64__(Z231030-8253)GLNA-F_A133971_G05.ab1	67	564
C65	GZ67	glnA	2	498	GZ_2310300924Q_4_65__(Z231030-8253)GLNA-F_A133971_H05.ab1	68	565
C66	GZ68	glnA	2	498	GZ_2310300925Q_4_66__(Z231030-8253)GLNA-F_A133971_A06.ab1	67	564
C67	GZ69	glnA	4	498	GZ_2310300926Q_4_67__(Z231030-8253)GLNA-F_A133971_B06.ab1	70	567
C69	GZ71	glnA	2	498	GZ_2310300927Q_4_69__(Z231030-8253)GLNA-F_A133971_C06.ab1	70	567
C70	GZ72/gz74	glnA	2	498	GZ_2310300928Q_4_70__(Z231030-8253)GLNA-F_A133971_D06.ab1	67	564
C71	GZ73	glnA	2	498	GZ_2310300929Q_4_71__(Z231030-8253)GLNA-F_A133971_E06.ab1	70	567
C72	GZ74	glnA	2	498	GZ_2310300930Q_4_72__(Z231030-8253)GLNA-F_A133971_F06.ab1	68	565
C73	GZ75	glnA	1	498	GZ_2310300931Q_4_73__(Z231030-8253)GLNA-F_A133971_G06.ab1	70	567
C74	GZ76	glnA	2	498	GZ_2310300932Q_4_74__(Z231030-8253)GLNA-F_A133971_H06.ab1	80	577
C75	GZ77	glnA	2	498	GZ_2310300933Q_4_75__(Z231030-8253)GLNA-F_A133971_A07.ab1	67	564
C76	GZ78	glnA	1	498	GZ_2310300934Q_4_76__(Z231030-8253)GLNA-F_A133971_B07.ab1	70	567
C77	GZ79	glnA	2	498	GZ_2310300935Q_4_77__(Z231030-8253)GLNA-F_A133971_C07.ab1	72	569
C78	GZ80	glnA	1	498	GZ_2310300936Q_4_78__(Z231030-8253)GLNA-F_A133971_D07.ab1	68	565
C79	GZ81	glnA	2	498	GZ_2310300937Q_4_79__(Z231030-8253)GLNA-F_A133971_E07.ab1	69	566
C80	GZ82	glnA	2	498	GZ_2310300938Q_4_80__(Z231030-8253)GLNA-F_A133971_F07.ab1	68	565
C81	GZ83	glnA	4	498	GZ_2310300939Q_4_81__(Z231030-8253)GLNA-F_A133971_G07.ab1	69	566
C82	GZ84	glnA	2	498	GZ_2310300940Q_4_82__(Z231030-8253)GLNA-F_A133971_H07.ab1	67	564
C83	GZ85	glnA	4	498	GZ_2310300941Q_4_83__(Z231030-8253)GLNA-F_A133971_A08.ab1	69	566
C84	GZ86	glnA	2	498	GZ_2310300942Q_4_84__(Z231030-8253)GLNA-F_A133971_B08.ab1	69	566
C85	GZ87	glnA	2	498	GZ_2310300943Q_4_85__(Z231030-8253)GLNA-F_A133971_C08.ab1	68	565
C86	GZ88	glnA	2	498	GZ_2310300944Q_4_86__(Z231030-8253)GLNA-F_A133971_D08.ab1	68	56
C87	gz41	glnA	2	498	GZ_2310300945Q_4_87__(Z231030-8253)GLNA-F_A133971_E08.ab1	70	567
C88	gz42	glnA	2	498	GZ_2310300946Q_4_88__(Z231030-8253)GLNA-F_A133971_F08.ab1	69	566
C89	gz43	glnA	1	498	GZ_2310300947Q_4_89__(Z231030-8253)GLNA-F_A133971_G08.ab1	71	568
C90	gz44	glnA	2	498	GZ_2310300948Q_4_90__(Z231030-8253)GLNA-F_A133971_H08.ab1	69	566
C91	gz45	glnA	2	498	GZ_2310300949Q_4_91__(Z231030-8253)GLNA-F_A133971_A09.ab1	68	565
C92	gz46	glnA	2	498	GZ_2310300950Q_4_92__(Z231030-8253)GLNA-F_A133971_B09.ab1	69	566
C93	gz47	glnA	2	498	GZ_2310300951Q_4_93__(Z231030-8253)GLNA-F_A133971_C09.ab1	68	565
C94	gz48	glnA	2	498	GZ_2310300952Q_4_94__(Z231030-8253)GLNA-F_A133971_D09.ab1	69	566
C95	gz49	glnA	1	498	GZ_2310300953Q_4_95__(Z231030-8253)GLNA-F_A133971_E09.ab1	70	567
C96	gz50	glnA	4	498	GZ_2310300954Q_4_96__(Z231030-8253)GLNA-F_A133971_F09.ab1	72	569
C97	gz51	glnA	2	498	GZ_2310300955Q_4_97__(Z231030-8253)GLNA-F_A133971_G09.ab1	67	564
C98	gz52	glnA	2	498	GZ_2310300956Q_4_98__(Z231030-8253)GLNA-F_A133971_H09.ab1	71	568
C99	gz53	glnA	2	498	GZ_2310300957Q_4_99__(Z231030-8253)GLNA-F_A133971_A10.ab1	70	567
C100	gz54	glnA	70	498	GZ_2310300958Q_4_100__(Z231030-8253)GLNA-F_A133971_B10.ab1	70	567
C101	gz55	glnA	2	498	GZ_2310300959Q_4_101__(Z231030-8253)GLNA-F_A133971_C10.ab1	70	567
C102	gz56	glnA	3	498	GZ_2310300960Q_4_102__(Z231030-8253)GLNA-F_A133971_D10.ab1	68	565
C103	gz57	glnA	2	498	GZ_2310300961Q_4_103__(Z231030-8253)GLNA-F_A133971_E10.ab1	70	567
C104	gz59	glnA	5	498	GZ_2310300962Q_4_104__(Z231030-8253)GLNA-F_A133971_F10.ab1	69	566
C105	gz60	glnA	2	498	GZ_2310300963Q_4_105__(Z231030-8253)GLNA-F_A133971_G10.ab1	70	567
C106	gz62	glnA	2	498	GZ_2310300964Q_4_106__(Z231030-8253)GLNA-F_A133971_H10.ab1	69	566
C107	gz64	glnA	2	498	GZ_2310300965Q_4_107__(Z231030-8253)GLNA-F_A133971_A11.ab1	70	567
C108	gz65	glnA	2	498	GZ_2310240404Q_65-4__(Z231025-8211)glnA-F_A133971_A05-0.ab1	68	565
C109	gz66	glnA	1	498	GZ_2310300966Q_4_109__(Z231030-8253)GLNA-F_A133971_B11.ab1	71	568
C110	gz67	glnA	2	498	GZ_2310240420Q_67-4__(Z231025-8211)glnA-F_A133971_B12.ab1	79	576
C111	gz68	glnA	1	498	GZ_2310240428Q_68-4__(Z231025-8211)glnA-F_A133971_C12.ab1	78	575
C112	gz69	glnA	3	498	GZ_2310240436Q_69-4__(Z231025-8211)glnA-F_A133971_D12.ab1	67	564
C113	gz70	glnA	3	498	GZ_2310240444Q_70-4__(Z231025-8211)glnA-F_A133971_E12.ab1	69	566
C114	gz71	glnA	2	498	GZ_2401160402Q_4_114__(Z240115-6346)glnA-F_A133971_D02.ab1	69	566
C115	gz72	glnA	4	498	GZ_2310240460Q_72-4__(Z231025-8211)glnA-F_A133971_F12.ab1	68	565
C116	gz73	glnA	2	498	GZ_2310240468Q_73-4__(Z231025-8211)glnA-F_A133971_G12.ab1	78	575
C117	gz75	glnA	3	498	GZ_2310240476Q_75-4__(Z231025-8211)glnA-F_A133971_G06.ab1	67	564
C124	gz07	glnA	1	498	GZ_2404160830Q_4_7__(Z240416-8130)4F_A133971_F04.ab1	68	565
C157	gz40	glnA	2	498	GZ_2404160831Q_4_40__(Z240416-8130)4F_A133971_G04.ab1	70	567

## Sheet: 5-sdhA
C	serial number	Locus	Allele	Length	Contig	Start position	End position	Flags
C1	2	sdhA	1	519	GZ_2404160841Q_5_1__(Z240416-8132)5F_A133971_F05.ab1	36	554
C2	4	sdhA	3	519	GZ_2404160834Q_5_2__(Z240416-8132)5F_A133971_H04.ab1	35	553
C3	6	sdhA	1	519	GZ_2404160835Q_5_3__(Z240416-8132)5F_A133971_A05.ab1	37	555
C4	7	sdhA	1	519	GZ_2404160836Q_5_4__(Z240416-8132)5F_A133971_B05.ab1	36	554
C5	8	sdhA	3	519	GZ_2404160837Q_5_5__(Z240416-8132)5F_A133971_C05.ab1	37	555
C6	9	sdhA	3	519	GZ_2401160181Q_5_6__(Z240115-6340)sdhA-F_A133971_E02.ab1	35	553
C7	10	sdhA	1	519	GZ_2401160182Q_5_7__(Z240115-6340)sdhA-F_A133971_F02.ab1	37	555
C8	11	sdhA	1	519	GZ_2401160183Q_5_8__(Z240115-6340)sdhA-F_A133971_G02.ab1	35	553
C9	12	sdhA	1	519	GZ_2401160184Q_5_9__(Z240115-6340)sdhA-F_A133971_H02.ab1	36	554
C10	13	sdhA	1	519	GZ_2401160185Q_5_10__(Z240115-6340)sdhA-F_A133971_A03.ab1	36	554
C11	15	sdhA	3	519	GZ_2401160186Q_5_11__(Z240115-6340)sdhA-F_A133971_B03.ab1	36	554
C12	16	sdhA	2	519	GZ_2401160187Q_5_12__(Z240115-6340)sdhA-F_A133971_C03.ab1	38	556
C13	18	sdhA	1	519	GZ_2401160188Q_5_13__(Z240115-6340)sdhA-F_A133971_D03.ab1	36	554
C14	19	sdhA	1	519	GZ_2401160189Q_5_14__(Z240115-6340)sdhA-F_A133971_E03.ab1	37	555
C15	20	sdhA	1	519	GZ_2401160190Q_5_15__(Z240115-6340)sdhA-F_A133971_F03.ab1	35	553
C16	21	sdhA	1	519	GZ_2401160191Q_5_16__(Z240115-6340)sdhA-F_A133971_G03.ab1	37	555
C18	23	sdhA	1	519	GZ_2401160192Q_5_18__(Z240115-6340)sdhA-F_A133971_H03.ab1	36	554
C19	24	sdhA	1	519	GZ_2401160193Q_5_19__(Z240115-6340)sdhA-F_A133971_A04.ab1	39	557
C20	25	sdhA	1	519	GZ_2401160194Q_5_20__(Z240115-6340)sdhA-F_A133971_B04.ab1	37	555
C21	27	sdhA	9	519	GZ_2401160195Q_5_21__(Z240115-6340)sdhA-F_A133971_C04.ab1	36	554
C22	28	sdhA	1	519	GZ_2401160196Q_5_22__(Z240115-6340)sdhA-F_A133971_D04.ab1	37	555
C23	29	sdhA	3	519	GZ_2401160201Q_5_23__(Z240115-6340)sdhA-F_A133971_B12.ab1	37	555
C24	30	sdhA	1	519	GZ_2401310923Q_5_24__(Z240131-8457)sdhA-F_A133971_G09.ab1	37	555
C25	31	sdhA	1	519	GZ_2401160203Q_5_25__(Z240115-6340)sdhA-F_A133971_C12.ab1	38	556
C61	GZ63	sdhA	2	519	GZ_2401160204Q_5_61__(Z240115-6340)sdhA-F_A133971_D12.ab1	38	556
C62	GZ64/gz61	sdhA	1	519	GZ_2401160205Q_5_62__(Z240115-6340)sdhA-F_A133971_E12.ab1	37	555
C63	GZ65	sdhA	1	519	GZ_2401160206Q_5_63__(Z240115-6340)sdhA-F_A133971_F12.ab1	36	554
C64	GZ66	sdhA	1	519	GZ_2401160207Q_5_64__(Z240115-6340)sdhA-F_A133971_E04.ab1	40	558
C65	GZ67	sdhA	1	519	GZ_2401160208Q_5_65__(Z240115-6340)sdhA-F_A133971_F04.ab1	38	556
C66	GZ68	sdhA	1	519	GZ_2401160209Q_5_66__(Z240115-6340)sdhA-F_A133971_A04.ab1	35	553
C67	GZ69	sdhA	2	519	GZ_2401160210Q_5_67__(Z240115-6340)sdhA-F_A133971_B04.ab1	36	554
C69	GZ71	sdhA	1	519	GZ_2401160211Q_5_69__(Z240115-6340)sdhA-F_A133971_C04.ab1	38	556
C70	GZ72/gz74	sdhA	1	519	GZ_2401310924Q_5_70__(Z240131-8457)sdhA-F_A133971_F08.ab1	36	554
C71	GZ73	sdhA	1	519	GZ_2401160213Q_5_71__(Z240115-6340)sdhA-F_A133971_E04.ab1	36	554
C72	GZ74	sdhA	1	519	GZ_2401160214Q_5_72__(Z240115-6340)sdhA-F_A133971_F04.ab1	37	555
C73	GZ75	sdhA	3	519	GZ_2401160215Q_5_73__(Z240115-6340)sdhA-F_A133971_G04.ab1	38	556
C74	GZ76	sdhA	2	519	GZ_2401160216Q_5_74__(Z240115-6340)sdhA-F_A133971_G04.ab1	37	555
C75	GZ77	sdhA	1	519	GZ_2401160217Q_5_75__(Z240115-6340)sdhA-F_A133971_A05.ab1	35	553
C76	GZ78	sdhA	3	519	GZ_2401160218Q_5_76__(Z240115-6340)sdhA-F_A133971_H04.ab1	38	556
C77	GZ79	sdhA	1	519	GZ_2401160219Q_5_77__(Z240115-6340)sdhA-F_A133971_A05.ab1	38	556
C78	GZ80	sdhA	3	519	GZ_2401160220Q_5_78__(Z240115-6340)sdhA-F_A133971_B05.ab1	35	553
C79	GZ81	sdhA	1	519	GZ_2401160221Q_5_79__(Z240115-6340)sdhA-F_A133971_C05.ab1	37	555
C80	GZ82	sdhA	1	519	GZ_2401160222Q_5_80__(Z240115-6340)sdhA-F_A133971_B05.ab1	39	557
C81	GZ83	sdhA	2	519	GZ_2401160223Q_5_81__(Z240115-6340)sdhA-F_A133971_C05.ab1	35	553
C82	GZ84	sdhA	1	519	GZ_2401160224Q_5_82__(Z240115-6340)sdhA-F_A133971_D05.ab1	38	556
C83	GZ85	sdhA	2	519	GZ_2401160225Q_5_83__(Z240115-6340)sdhA-F_A133971_D05.ab1	36	554
C84	GZ86	sdhA	9	519	GZ_2401160226Q_5_84__(Z240115-6340)sdhA-F_A133971_E05.ab1	38	556
C85	GZ87	sdhA	1	519	GZ_2401160227Q_5_85__(Z240115-6340)sdhA-F_A133971_E05.ab1	37	555
C86	GZ88	sdhA	1	519	GZ_2401310925Q_5_86__(Z240131-8457)sdhA-F_A133971_G08.ab1	37	555
C87	gz41	sdhA	1	519	GZ_2401160229Q_5_87__(Z240115-6340)sdhA-F_A133971_F05.ab1	36	554
C88	gz42	sdhA	2	519	GZ_2401310926Q_5_88__(Z240131-8457)sdhA-F_A133971_B10.ab1	37	555
C89	gz43	sdhA	3	519	GZ_2401160231Q_5_89__(Z240115-6340)sdhA-F_A133971_H05.ab1	38	556
C90	gz44	sdhA	1	519	GZ_2401160232Q_5_90__(Z240115-6340)sdhA-F_A133971_A06.ab1	36	554
C91	gz45	sdhA	1	519	GZ_2401160233Q_5_91__(Z240115-6340)sdhA-F_A133971_B06.ab1	37	555
C92	gz46	sdhA	1	519	GZ_2401160234Q_5_92__(Z240115-6340)sdhA-F_A133971_C06.ab1	37	555
C93	gz47	sdhA	1	519	GZ_2401160235Q_5_93__(Z240115-6340)sdhA-F_A133971_D06.ab1	36	554
C94	gz48	sdhA	1	519	GZ_2401160236Q_5_94__(Z240115-6340)sdhA-F_A133971_E06.ab1	37	555
C95	gz49	sdhA	3	519	GZ_2401160237Q_5_95__(Z240115-6340)sdhA-F_A133971_F06.ab1	39	557
C96	gz50	sdhA	2	519	GZ_2401160238Q_5_96__(Z240115-6340)sdhA-F_A133971_G06.ab1	38	556
C97	gz51	sdhA	1	519	GZ_2401160239Q_5_97__(Z240115-6340)sdhA-F_A133971_H06.ab1	36	554
C98	gz52	sdhA	1	519	GZ_2310240485Q_98-5__(Z231025-8213)sdhA-F_A133971_C02.ab1	37	555
C99	gz53	sdhA	1	519	GZ_2401160241Q_5_99__(Z240115-6340)sdhA-F_A133971_A07.ab1	35	553
C100	gz54	sdhA	9	519	GZ_2401160242Q_5_100__(Z240115-6340)sdhA-F_A133971_B07.ab1	36	554
C101	gz55	sdhA	1	519	GZ_2401160243Q_5_101__(Z240115-6340)sdhA-F_A133971_C07.ab1	34	552
C102	gz56	sdhA	9	519	GZ_2401160244Q_5_102__(Z240115-6340)sdhA-F_A133971_G05.ab1	37	555
C103	gz57	sdhA	1	519	GZ_2401160245Q_5_103__(Z240115-6340)sdhA-F_A133971_D07.ab1	36	554
C104	gz59	sdhA	2	519	GZ_2401160246Q_5_104__(Z240115-6340)sdhA-F_A133971_E07.ab1	37	555
C105	gz60	sdhA	1	519	GZ_2401160247Q_5_105__(Z240115-6340)sdhA-F_A133971_H05.ab1	38	556
C106	gz62	sdhA	1	519	GZ_2401160248Q_5_106__(Z240115-6340)sdhA-F_A133971_F07.ab1	36	554
C107	gz64	sdhA	1	519	GZ_2401160249Q_5_107__(Z240115-6340)sdhA-F_A133971_A08.ab1	36	554
C108	gz65	sdhA	1	519	GZ_2310240405Q_65-5__(Z231025-8213)sdhA-F_A133971_F08.ab1	35	553
C109	gz66	sdhA	3	519	GZ_2310240413Q_66-5__(Z231025-8213)sdhA-F_A133971_G08.ab1	35	553
C110	gz67	sdhA	9	519	GZ_2310240421Q_67-5__(Z231025-8213)sdhA-F_A133971_H08.ab1	39	557
C111	gz68	sdhA	1	519	GZ_2404160840Q_5_111__(Z240416-8132)5F_A133971_E05.ab1	35	553
C112	gz69	sdhA	9	519	GZ_2404160860Q_5_112__(Z240416-8132)5F_A133971_E05.ab1	37	555
C113	gz70	sdhA	2	519	GZ_2310240445Q_70-5__(Z231025-8213)sdhA-F_A133971_H07.ab1	38	556
C114	gz71	sdhA	1	519	GZ_2404160861Q_5_114__(Z240416-8132)5F_A133971_F07.ab1	35	553
C115	gz72	sdhA	2	519	GZ_2310240461Q_72-5__(Z231025-8213)sdhA-F_A133971_C09.ab1	37	555
C116	gz73	sdhA	93					172G → 205A
C117	gz75	sdhA	2	519	GZ_2401160250Q_5_117__(Z240115-6340)sdhA-F_A133971_B08.ab1	36	554
C124	gz07	sdhA	3	519	GZ_2404160840Q_5_124__(Z240416-8132)5F_A133971_E04.ab1	35	553
C157	gz40	sdhA	1	519	GZ_2404160839Q_5_40__(Z240416-8132)5F_A133971_D05.ab1	35	553

## Sheet: 6-glcK
C	serial number	Locus	Allele	Length	Contig	Start position	End position	Flags
C1	2	glcK	1	459	GZ_2404160841Q_6_1__(Z240416-8134)6F_A133971_E05.ab1	66	524
C2	4	glcK	3	459	GZ_2404160842Q_6_2__(Z240416-8134)6F_A133971_F05.ab1	64	522
C3	6	glcK	2	459	GZ_2404160843Q_6_3__(Z240416-8134)6F_A133971_G05.ab1	66	524
C4	7	glcK	1	459	GZ_2404160844Q_6_4__(Z240416-8134)6F_A133971_H05.ab1	66	524
C5	8	glcK	3	459	GZ_2404160845Q_6_5__(Z240416-8134)6F_A133971_A06.ab1	66	524
C6	9	glcK	3	459	GZ_2401160257Q_6_6__(Z240115-6342)glcK-F_A133971_A06.ab1	66	524
C7	10	glcK	1	459	GZ_2401160258Q_6_7__(Z240115-6342)glcK-F_A133971_C08.ab1	64	522
C8	11	glcK	1	459	GZ_2401160259Q_6_8__(Z240115-6342)glcK-F_A133971_D08.ab1	67	525
C9	12	glcK	1	459	GZ_2401160260Q_6_9__(Z240115-6342)glcK-F_A133971_E08.ab1	65	523
C10	13	glcK	1	459	GZ_2401160261Q_6_10__(Z240115-6342)glcK-F_A133971_F08.ab1	65	523
C11	15	glcK	3	459	GZ_2401160262Q_6_11__(Z240115-6342)glcK-F_A133971_G08.ab1	66	524
C12	16	glcK	1	459	GZ_2401160263Q_6_12__(Z240115-6342)glcK-F_A133971_B06.ab1	66	524
C13	18	glcK	1	459	GZ_2401160264Q_6_13__(Z240115-6342)glcK-F_A133971_C06.ab1	66	524
C14	19	glcK	1	459	GZ_2401160265Q_6_14__(Z240115-6342)glcK-F_A133971_A09.ab1	66	524
C15	20	glcK	1	459	GZ_2401160266Q_6_15__(Z240115-6342)glcK-F_A133971_B09.ab1	65	523
C16	21	glcK	1	459	GZ_2401160267Q_6_16__(Z240115-6342)glcK-F_A133971_C09.ab1	67	525
C18	23	glcK	1	459	GZ_2401160268Q_6_18__(Z240115-6342)glcK-F_A133971_D09.ab1	65	523
C19	24	glcK	1	459	GZ_2401290709Q_6_19__(Z240129-7773)glcK-F_A133971_A10.ab1	67	525
C20	25	glcK	2	459	GZ_2401290710Q_6_20__(Z240129-7773)glcK-F_A133971_B10.ab1	64	522
C21	27	glcK	3	459	GZ_2401160271Q_6_21__(Z240115-6342)glcK-F_A133971_G09.ab1	69	527
C22	28	glcK	3	459	GZ_2401160273Q_6_23__(Z240115-6342)glcK-F_A133971_D06.ab1	66	524
C23	29	glcK	3	459	GZ_2401160273Q_6_23__(Z240115-6342)glcK-F_A133971_D06.ab1	66	524
C24	30	glcK	1	459	GZ_2404160848Q_6_24__(Z240416-8134)6F_A133971_C06.ab1	67	525
C25	31	glcK	1	459	GZ_2401290713Q_6_25__(Z240129-7773)glcK-F_A133971_E10.ab1	68	526
C61	GZ63	glcK	1	459	GZ_2401160276Q_6_61__(Z240115-6342)glcK-F_A133971_A10.ab1	66	524
C62	GZ64/gz61	glcK	1	459	GZ_2401290714Q_6_62__(Z240129-7773)glcK-F_A133971_F10.ab1	66	524
C63	GZ65	glcK	1	459	GZ_2401290715Q_6_63__(Z240129-7773)glcK-F_A133971_G10.ab1	68	526
C64	GZ66	glcK	2	459	GZ_2401290716Q_6_64__(Z240129-7773)glcK-F_A133971_H10.ab1	71	529
C65	GZ67	glcK	1	459	GZ_2401160280Q_6_65__(Z240115-6342)glcK-F_A133971_B10.ab1	66	524
C66	GZ68	glcK	1	459	GZ_2401160281Q_6_66__(Z240115-6342)glcK-F_A133971_C10.ab1	66	524
C67	GZ69	glcK	2	459	GZ_2401160282Q_6_67__(Z240115-6342)glcK-F_A133971_D10.ab1	69	527
C69	GZ71	glcK	1	459	GZ_2401160283Q_6_69__(Z240115-6342)glcK-F_A133971_E10.ab1	67	525
C70	GZ72/gz74	glcK	1	459	GZ_2401290717Q_6_70__(Z240129-7773)glcK-F_A133971_A11.ab1	64	522
C71	GZ73	glcK	1	459	GZ_2401290718Q_6_71__(Z240129-7773)glcK-F_A133971_B11.ab1	68	526
C72	GZ74	glcK	1	459	GZ_2401160286Q_6_72__(Z240115-6342)glcK-F_A133971_F10.ab1	70	528
C73	GZ75	glcK	1	459	GZ_2401290719Q_6_73__(Z240129-7773)glcK-F_A133971_C11.ab1	68	526
C74	GZ76	glcK	2	459	GZ_2401160288Q_6_74__(Z240115-6342)glcK-F_A133971_H10.ab1	68	526
C75	GZ77	glcK	1	459	GZ_2401160289Q_6_75__(Z240115-6342)glcK-F_A133971_A11.ab1	66	524
C76	GZ78	glcK	2	459	GZ_2401160290Q_6_76__(Z240115-6342)glcK-F_A133971_B11.ab1	71	529
C77	GZ79	glcK	1	459	GZ_2401160291Q_6_77__(Z240115-6342)glcK-F_A133971_C11.ab1	67	525
C78	GZ80	glcK	3	459	GZ_2401160292Q_6_78__(Z240115-6342)glcK-F_A133971_D11.ab1	70	528
C79	GZ81	glcK	1	459	GZ_2401290720Q_6_79__(Z240129-7773)glcK-F_A133971_D11.ab1	69	527
C80	GZ82	glcK	1	459	GZ_2401290724Q_6_80__(Z240129-7773)glcK-F_A133971_H11.ab1	67	525
C81	GZ83	glcK	2	459	GZ_2401160295Q_6_81__(Z240115-6342)glcK-F_A133971_G11.ab1	68	526
C82	GZ84	glcK	1	459	GZ_2401160296Q_6_82__(Z240115-6342)glcK-F_A133971_H11.ab1	67	525
C83	GZ85	glcK	3	459	GZ_2401160301Q_6_83__(Z240115-6342)glcK-F_A133971_A02.ab1	65	523
C84	GZ86	glcK	3	459	GZ_2401160302Q_6_84__(Z240115-6342)glcK-F_A133971_B02.ab1	65	523
C85	GZ87	glcK	1	459	GZ_2401160303Q_6_85__(Z240115-6342)glcK-F_A133971_C02.ab1	67	525
C86	GZ88	glcK	1	459	GZ_2401160305Q_6_87__(Z240115-6342)glcK-F_A133971_E02.ab1	67	525
C87	gz41	glcK	1	459	GZ_2401160305Q_6_87__(Z240115-6342)glcK-F_A133971_E02.ab1	67	525
C88	gz42	glcK	2	459	GZ_2401160306Q_6_88__(Z240115-6342)glcK-F_A133971_F02.ab1	65	523
C89	gz43	glcK	3	459	GZ_2401160307Q_6_89__(Z240115-6342)glcK-F_A133971_G02.ab1	65	523
C90	gz44	glcK	1	459	GZ_2401160308Q_6_90__(Z240115-6342)glcK-F_A133971_H02.ab1	69	527
C91	gz45	glcK	1	459	GZ_2401160309Q_6_91__(Z240115-6342)glcK-F_A133971_C05.ab1	71	529
C92	gz46	glcK	1	459	GZ_2401160310Q_6_92__(Z240115-6342)glcK-F_A133971_D05.ab1	68	526
C93	gz47	glcK	1	459	GZ_2401160311Q_6_93__(Z240115-6342)glcK-F_A133971_E05.ab1	67	525
C94	gz48	glcK	1	459	GZ_2401290722Q_6_94__(Z240129-7773)glcK-F_A133971_F11.ab1	69	527
C95	gz49	glcK	3	459	GZ_2401160313Q_6_95__(Z240115-6342)glcK-F_A133971_B01.ab1	65	523
C96	gz50		85	81				SAG0471 (glk): 85
C97	gz51	glcK	1	459	GZ_2401160315Q_6_97__(Z240115-6342)glcK-F_A133971_C01.ab1	62	520
C98	gz52	glcK	1	459	GZ_2401160316Q_6_98__(Z240115-6342)glcK-F_A133971_D01.ab1	65	523
C99	gz53	glcK	1	459	GZ_2401160317Q_6_99__(Z240115-6342)glcK-F_A133971_A07.ab1	67	525
C100	gz54	glcK	3	459	GZ_2401160318Q_6_100__(Z240115-6342)glcK-F_A133971_E01.ab1	65	523
C101	gz55	glcK	1	459	GZ_2401160319Q_6_101__(Z240115-6342)glcK-F_A133971_B07.ab1	67	525
C102	gz56	glcK	3	459	GZ_2401160320Q_6_102__(Z240115-6342)glcK-F_A133971_C07.ab1	65	523
C103	gz57	glcK	1	459	GZ_2401160321Q_6_103__(Z240115-6342)glcK-F_A133971_D07.ab1	65	523
C104	gz59	glcK	2	459	GZ_2401160322Q_6_104__(Z240115-6342)glcK-F_A133971_F01.ab1	72	530
C105	gz60	glcK	1	459	GZ_2401160323Q_6_105__(Z240115-6342)glcK-F_A133971_E07.ab1	66	524
C106	gz62	glcK	1	459	GZ_2404160864Q_6_106__(Z240416-8134)6F_A133971_G05.ab1	66	524	SAG0471 (glk)
C107	gz64	glcK	1	459	GZ_2401160325Q_6_107__(Z240115-6342)glcK-F_A133971_F07.ab1	69	527
C108	gz65	glcK	1	459	GZ_2401160326Q_6_108__(Z240115-6342)glcK-F_A133971_A03.ab1	67	525
C109	gz66	glcK	3	459	GZ_2310240414Q_66-6__(Z231025-8209)glck-F_A133971_C01.ab1	67	525
C110	gz67	glcK	3	459	GZ_2401160327Q_6_110__(Z240115-6342)glcK-F_A133971_F05.ab1	65	523
C111	gz68	glcK	130	459	GZ_2310240430Q_68-6__(Z231025-8209)glck-F_A133971_D11.ab1	65	523
C112	gz69	glcK	3	459	GZ_2310240438Q_69-6__(Z231025-8209)glck-F_A133971_E11.ab1	64	522
C113	gz70	glcK	3	459	GZ_2404160865Q_6_113__(Z240416-8134)6F_A133971_H05.ab1	64	522
C114	gz71	glcK	1	459	GZ_2401160328Q_6_114__(Z240115-6342)glcK-F_A133971_B03.ab1	64	522
C115	gz72	glcK	3	459	GZ_2310240462Q_72-6__(Z231025-8209)glck-F_A133971_A02.ab1	68	526
C116	gz73	glcK	1	459	GZ_2401290725Q_6_116__(Z240129-7773)glcK-F_A133971_B12.ab1	69	527
C117	gz75	glcK	1	459	GZ_2401160330Q_6_117__(Z240115-6342)glcK-F_A133971_D03.ab1	67	525
C124	gz07	glcK	3	459	GZ_2310240462Q_72-6__(Z231025-8209)glck-F_A133971_A02.ab1	68
C157	gz40	glcK	1	459	GZ_2404160847Q_6_40__(Z240416-8134)6F_A133971_B06.ab1	65	523

## Sheet: 7-tkt
C	serial number	Locus	Allele	Length	Contig	Start position	End position	Flags
C1	2	tkt	1	480	GZ_2404160849Q_7_1__(Z240416-8136)7F_A133971_D06.ab1	66	545
C2	4	tkt	2	480	GZ_2404160850Q_7_2__(Z240416-8136)7F_A133971_E06.ab1	67	546
C3	6	tkt	2	480	GZ_2404160851Q_7_3__(Z240416-8136)7F_A133971_F06.ab1	66	545
C4	7	tkt	1	480	GZ_2404160852Q_7_4__(Z240416-8136)7F_A133971_G04.ab1	66	545	SAG0278 (tkt): 87
C5	8	tkt	2	480	GZ_2404160853Q_7_5__(Z240416-8136)7F_A133971_H04.ab1	67	546
C6	9	tkt	2	480	GZ_2401160333Q_7_6__(Z240115-6344)tkt-F_A133971_G05.ab1	68	547
C7	10	tkt	1	480	GZ_2401160334Q_7_7__(Z240115-6344)tkt-F_A133971_H07.ab1	68	547
C8	11	tkt	1	480	GZ_2401160335Q_7_8__(Z240115-6344)tkt-F_A133971_A08.ab1	68	547
C9	12	tkt	1	480	GZ_2401160336Q_7_9__(Z240115-6344)tkt-F_A133971_B08.ab1	68	547
C10	13	tkt	1	480	GZ_2401160337Q_7_10__(Z240115-6344)tkt-F_A133971_C08.ab1	67	546
C11	15	tkt	2	480	GZ_2401160338Q_7_11__(Z240115-6344)tkt-F_A133971_D08.ab1	67	546
C12	16	tkt	3	480	GZ_2401160339Q_7_12__(Z240115-6344)tkt-F_A133971_E08.ab1	69	548
C13	18	tkt	1	480	GZ_2401160340Q_7_13__(Z240115-6344)tkt-F_A133971_F08.ab1	68	547
C14	19	tkt	1	480	GZ_2401160341Q_7_14__(Z240115-6344)tkt-F_A133971_G08.ab1	70	549
C15	20	tkt	1	480	GZ_2401160342Q_7_15__(Z240115-6344)tkt-F_A133971_H08.ab1	68	547
C16	21	tkt	1	480	GZ_2401160343Q_7_16__(Z240115-6344)tkt-F_A133971_A09.ab1	70	549
C18	23	tkt	1	480	GZ_2401160344Q_7_18__(Z240115-6344)tkt-F_A133971_B09.ab1	69	548
C19	24	tkt	1	480	GZ_2401160345Q_7_19__(Z240115-6344)tkt-F_A133971_C09.ab1	65	544
C20	25	tkt	2	480	GZ_2401160346Q_7_20__(Z240115-6344)tkt-F_A133971_D09.ab1	68	547
C21	27	tkt	2	480	GZ_2401160347Q_7_21__(Z240115-6344)tkt-F_A133971_E09.ab1	67	546
C22	28	tkt	1	480	GZ_2401310929Q_7_22__(Z240131-8461)tkt-F_A133971_E10.ab1	67	546
C23	29	tkt	2	480	GZ_2401160349Q_7_23__(Z240115-6344)tkt-F_A133971_F09.ab1	69	548
C24	30	tkt	1	480	GZ_2401310930Q_7_24__(Z240131-8461)tkt-F_A133971_F10.ab1	68	547
C25	31	tkt	1	480	GZ_2401160351Q_7_25__(Z240115-6344)tkt-F_A133971_F03.ab1	66	545
C61	GZ63	tkt	3	480	GZ_2401160352Q_7_61__(Z240115-6344)tkt-F_A133971_G09.ab1	67	546
C62	GZ64/gz61	tkt	1	480	GZ_2401160353Q_7_62__(Z240115-6344)tkt-F_A133971_H09.ab1	68	547
C63	GZ65	tkt	1	480	GZ_2401160354Q_7_63__(Z240115-6344)tkt-F_A133971_A10.ab1	70	549
C64	GZ66	tkt	2	480	GZ_2401160355Q_7_64__(Z240115-6344)tkt-F_A133971_B10.ab1	70	549
C65	GZ67	tkt	1	480	GZ_2401160356Q_7_65__(Z240115-6344)tkt-F_A133971_H05.ab1	69	548
C66	GZ68	tkt	1	480	GZ_2401160357Q_7_66__(Z240115-6344)tkt-F_A133971_A06.ab1	70	549
C67	GZ69	tkt	2	480	GZ_2401160358Q_7_67__(Z240115-6344)tkt-F_A133971_E10.ab1	69	548
C69	GZ71	tkt	1	480	GZ_2401160359Q_7_69__(Z240115-6344)tkt-F_A133971_F10.ab1	69	548
C70	GZ72/gz74	tkt	1	480	GZ_2401160360Q_7_70__(Z240115-6344)tkt-F_A133971_G10.ab1	65	544
C71	GZ73	tkt	1	480	GZ_2401160361Q_7_71__(Z240115-6344)tkt-F_A133971_H10.ab1	68	547
C72	GZ74	tkt	1	480	GZ_2401160362Q_7_72__(Z240115-6344)tkt-F_A133971_B06.ab1	67	546
C73	GZ75	tkt	2	480	GZ_2401160363Q_7_73__(Z240115-6344)tkt-F_A133971_G03.ab1	66	545
C74	GZ76	tkt	2	480	GZ_2401160364Q_7_74__(Z240115-6344)tkt-F_A133971_B11.ab1	65	544
C75	GZ77	tkt	1	480	GZ_2401160365Q_7_75__(Z240115-6344)tkt-F_A133971_C11.ab1	67	546
C76	GZ78	tkt	2	480	GZ_2401160366Q_7_76__(Z240115-6344)tkt-F_A133971_D11.ab1	66	545
C77	GZ79	tkt	1	480	GZ_2401160367Q_7_77__(Z240115-6344)tkt-F_A133971_E11.ab1	66	545
C78	GZ80	tkt	2	480	GZ_2401160368Q_7_78__(Z240115-6344)tkt-F_A133971_F11.ab1	68	547
C79	GZ81	tkt	1	480	GZ_2401310931Q_7_79__(Z240131-8461)tkt-F_A133971_G10.ab1	68	547
C80	GZ82	tkt	1	480	GZ_2401160370Q_7_80__(Z240115-6344)tkt-F_A133971_G11.ab1	69	548
C81	GZ83	tkt	2	480	GZ_2401160371Q_7_81__(Z240115-6344)tkt-F_A133971_H11.ab1	71	550
C82	GZ84	tkt	1	480	GZ_2401160372Q_7_82__(Z240115-6344)tkt-F_A133971_B12.ab1	67	546
C83	GZ85	tkt	2	480	GZ_2401160373Q_7_83__(Z240115-6344)tkt-F_A133971_C12.ab1	70	549
C84	GZ86	tkt	2	480	GZ_2401160374Q_7_84__(Z240115-6344)tkt-F_A133971_D12.ab1	68	547
C85	GZ87	tkt	1	480	GZ_2401160375Q_7_85__(Z240115-6344)tkt-F_A133971_E12.ab1	72	551
C86	GZ88	tkt	1	480	GZ_2401310932Q_7_86__(Z240131-8461)tkt-F_A133971_H10.ab1	67	546
C87	gz41	tkt	1	480	GZ_2401160377Q_7_87__(Z240115-6344)tkt-F_A133971_G12.ab1	68	547
C88	gz42	tkt	2	480	GZ_2401160378Q_7_88__(Z240115-6344)tkt-F_A133971_B01.ab1	70	549
C89	gz43	tkt	2	480	GZ_2401160379Q_7_89__(Z240115-6344)tkt-F_A133971_C01.ab1	69	548
C90	gz44	tkt	1	480	GZ_2401160380Q_7_90__(Z240115-6344)tkt-F_A133971_D01.ab1	70	549
C91	gz45	tkt	1	480	GZ_2401160381Q_7_91__(Z240115-6344)tkt-F_A133971_A04.ab1	66	545
C92	gz46	tkt	1	480	GZ_2401160382Q_7_92__(Z240115-6344)tkt-F_A133971_B04.ab1	66	545
C93	gz47	tkt	1	480	GZ_2401160383Q_7_93__(Z240115-6344)tkt-F_A133971_E01.ab1	70	549
C94	gz48	tkt	1	480	GZ_2401310933Q_7_94__(Z240131-8461)tkt-F_A133971_A11.ab1	68	547
C95	gz49	tkt	2	480	GZ_2401160385Q_7_95__(Z240115-6344)tkt-F_A133971_C04.ab1	66	545
C96	gz50	tkt	2	480	GZ_2401160386Q_7_96__(Z240115-6344)tkt-F_A133971_D04.ab1	66	545
C97	gz51	tkt	1	480	GZ_2401160387Q_7_97__(Z240115-6344)tkt-F_A133971_F01.ab1	68	547
C98	gz52	tkt	1	480	GZ_2401160388Q_7_98__(Z240115-6344)tkt-F_A133971_G01.ab1	77	556
C99	gz53	tkt	1	480	GZ_2401160389Q_7_99__(Z240115-6344)tkt-F_A133971_B02.ab1	66	545
C100	gz54	tkt	2	480	GZ_2401160390Q_7_100__(Z240115-6344)tkt-F_A133971_E04.ab1	68	547
C101	gz55	tkt	1	480	GZ_2401160391Q_7_101__(Z240115-6344)tkt-F_A133971_F04.ab1	66	545
C102	gz56	tkt	3	480	GZ_2401160392Q_7_102__(Z240115-6344)tkt-F_A133971_G04.ab1	66	545
C103	gz57	tkt	1	480	GZ_2401160393Q_7_103__(Z240115-6344)tkt-F_A133971_H04.ab1	68	547
C104	gz59	tkt	2	480	GZ_2401160394Q_7_104__(Z240115-6344)tkt-F_A133971_A05.ab1	67	546
C105	gz60	tkt	1	480	GZ_2401160395Q_7_105__(Z240115-6344)tkt-F_A133971_B05.ab1	67	546
C106	gz62	tkt	1	480	GZ_2401160396Q_7_106__(Z240115-6344)tkt-F_A133971_C05.ab1	66	545
C107	gz64	tkt	1	480	GZ_2401160401Q_7_107__(Z240115-6344)tkt-F_A133971_C02.ab1	67	546
C108	gz65	tkt	1	480	GZ_2310240407Q_65-7__(Z231025-8207)tkt-F_A133971_E09.ab1	64	543
C109	gz66		99					SAG0278 (tkt): 99
C110	gz67	tkt	2	480	GZ_2310240423Q_67-7__(Z231025-8207)tkt-F_A133971_G09.ab1	67	546
C111	gz68	tkt	2	480	GZ_2310240431Q_68-7__(Z231025-8207)tkt-F_A133971_H09.ab1	64	543
C112	gz69	tkt	3	480	GZ_2310240439Q_69-7__(Z231025-8207)tkt-F_A133971_A10.ab1	67	546
C113	gz70	tkt	3	480	GZ_2310240447Q_70-7__(Z231025-8207)tkt-F_A133971_E01.ab1	68	547
C114	gz71	tkt	1	480	GZ_2310240455Q_71-7__(Z231025-8207)tkt-F_A133971_C05-0.ab1	67	546
C115	gz72	tkt	2	480	GZ_2310240463Q_72-7__(Z231025-8207)tkt-F_A133971_B10.ab1	64	543
C116	gz73	tkt	1	480	GZ_2310240471Q_73-7__(Z231025-8207)tkt-F_A133971_C10.ab1	65	544
C117	gz75	tkt	3	480	GZ_2310240479Q_75-7__(Z231025-8207)tkt-F_A133971_B02.ab1	67	546
C124	gz07	tkt	2	480	GZ_2404160856Q_7_124__(Z240416-8136)7F_A133971_B06.ab1	67	546
C157	gz40	tkt	1	480	GZ_2404160855Q_7_157__(Z240416-8136)7F_A133971_A05.ab1	66	545	SAG0278 (tkt): 99
